# Supplementary material for: Multi-Omics Profiling Specifies Involvement of Alternative Ribosomal Proteins in Response to Zinc Limitation in Mycobacterium smegmatis
Source: Front Microbiol. 2022 Feb 10;13:811774. doi: 10.3389/fmicb.2022.811774 (PMC8866557; doi:10.3389/fmicb.2022.811774)
Supplement: Supplementary file 13 [file Table_13.XLSX]

## Sheet: S13. DEGs intersection
S13 Table. Differentially expressed genes only in cells with Alt-ribosomes. This table shows the genes at the intersection of wild type and ΔaltRP/c (the ΔaltRP complement strain) from the Venn diagram in Figure 3A. All genes on the list (i.e., in the intersection) are DE at the transcript level and the lfc values are calculated from expression in the wild type and ΔaltRP/c strains grown in ZLM, …
			wild type	ΔaltRP/c
MSMEG Locus	Name	Description	lfc	lfc
MSMEG_1679	amiB	AmiB	-5.15758	-3.08907
MSMEG_1680		conserved hypothetical protein	-5.11626	-3.04528
MSMEG_1682		flavin-containing monooxygenase FMO	-4.99066	-3.10572
MSMEG_1677	aspA	aspartate ammonia-lyase	-4.98034	-2.89532
MSMEG_1681		endoribonuclease L-PSP superfamily protein	-4.65645	-2.67538
MSMEG_1683		cytosine/purine/uracil/thiamine/allantoin permease family protein	-4.36193	-2.82638
MSMEG_1155		carnitinyl-CoA dehydratase	-3.67275	-2.93772
MSMEG_4748		hypothetical protein	-3.42091	-3.84027
MSMEG_4747		hypothetical protein	-3.27276	-2.80979
MSMEG_5208		conserved hypothetical protein	-3.10546	-2.16996
MSMEG_1156		dihydrodipicolinate synthetase	-3.103	-2.7977
MSMEG_6033		hypothetical protein	-2.9985	-2.41698
MSMEG_5153		conserved hypothetical protein	-2.92601	-2.08514
MSMEG_5368	ehuB	ectoine/hydroxyectoine ABC transporter solute-binding protein	-2.88571	-1.80092
MSMEG_3629		conserved hypothetical protein	-2.85342	-3.57176
MSMEG_5370	ehuD	ectoine/hydroxyectoine ABC transporter, permease protein EhuD	-2.82899	-1.77205
MSMEG_2078		antigen 85-C	-2.75771	-1.97455
MSMEG_0950		hypothetical protein	-2.71908	-2.2154
MSMEG_0065		conserved hypothetical protein	-2.70008	-2.21662
MSMEG_6554		hypothetical ABC transporter ATP-binding protein	-2.54686	-2.35877
MSMEG_1157		short chain dehydrogenase	-2.53889	-2.91969
MSMEG_6636		[Mn] superoxide dismutase	-2.53877	-1.94408
MSMEG_3962		lactate 2-monooxygenase	-2.44663	-1.62021
MSMEG_1948		hypothetical protein	-2.40506	-1.92407
MSMEG_0169		hypothetical protein	-2.40179	-1.7617
MSMEG_6555		transcriptional regulator, TetR family protein, putative	-2.38102	-3.04738
MSMEG_3756	rrlA		-2.33532	-2.29177
MSMEG_1158		5-oxovalerate dehydrogenase	-2.32488	-1.97604
MSMEG_4635		ammonium transporter family protein	-2.30815	-2.01481
MSMEG_0016		conserved domain protein	-2.30308	-2.22579
MSMEG_4233	pbpB	Penicillin binding protein transpeptidase domain protein	-2.28127	-1.5789
MSMEG_3418		conserved hypothetical protein	-2.27941	-1.77093
MSMEG_4757		fatty acid synthase	-2.27115	-1.99325
MSMEG_3200	nadB	L-aspartate oxidase	-2.2433	-3.08977
MSMEG_4219	sepF	conserved hypothetical protein	-2.24218	-1.64081
MSMEG_6405		Erp protein	-2.23176	-2.25681
MSMEG_3201	nadC	nicotinate-nucleotide pyrophosphorylase	-2.21463	-2.11768
MSMEG_4992		hypothetical protein	-2.19128	-3.34505
MSMEG_3616		integral membrane protein	-2.13325	-1.42278
MSMEG_5132	typA	GTP-binding protein TypA/BipA	-2.12565	-1.64172
MSMEG_3308		universal stress protein family protein, putative	-2.11496	-1.79128
MSMEG_2372	ilvB	acetolactate synthase, large subunit, biosynthetic type	-2.11474	-1.74425
MSMEG_1769		UsfY protein	-2.10301	-1.71188
MSMEG_0759	purA	adenylosuccinate synthetase	-2.07343	-1.65939
MSMEG_0672		conserved hypothetical protein	-2.06022	-2.30708
MSMEG_2373	ilvN	acetolactate synthase, small subunit	-2.05687	-1.44524
MSMEG_6767		mycocerosic acid synthase	-2.04046	-1.61988
MSMEG_4991		hypothetical protein	-2.04006	-1.87763
MSMEG_0012		ferric enterobactin transport system permease protein FepD	-2.01299	-1.54729
MSMEG_0305		acyltransferase domain protein	-2.01095	-1.68095
MSMEG_5146		binding protein dependent transport protein	-1.97674	-1.51561
MSMEG_6947	dnaA	chromosomal replication initiator protein DnaA	-1.96857	-1.32374
MSMEG_6037		2-hydroxy-6-ketonona-2,4-dienedioic acid hydrolase	-1.96266	-1.53555
MSMEG_1477		major facilitator superfamily protein	-1.93512	-1.37279
MSMEG_6419		conserved hypothetical protein	-1.91305	-2.98213
MSMEG_1221		rifampin ADP-ribosyl transferase	-1.89285	-1.38782
MSMEG_1672	sdhC	succinate dehydrogenase, cytochrome b556 subunit	-1.88929	-1.38561
MSMEG_2399	ung	uracil-DNA glycosylase	-1.85395	-1.44002
MSMEG_5412		immunogenic protein MPT63	-1.8471	-2.29981
MSMEG_5401		conserved hypothetical protein	-1.83423	-1.57029
MSMEG_1671	sdhD	succinate dehydrogenase hydrophobic membrane anchor protein SdhD	-1.80994	-1.54118
MSMEG_3188	bioA	adenosylmethionine-8-amino-7-oxononanoate transaminase	-1.69211	-1.56287
MSMEG_6610		protein of unknown function DUF58, putative	-1.68748	-1.59283
MSMEG_2636		regulatory protein, LacI	-1.68416	-1.41585
MSMEG_2012	hisD	histidinol dehydrogenase	-1.67068	-1.80161
MSMEG_2415		hemerythrin HHE cation binding region	-1.65289	-1.86251
MSMEG_4239		LppM protein	-1.65259	-1.34149
MSMEG_4234		conserved hypothetical protein	-1.65131	-2.22413
MSMEG_2107		conserved hypothetical protein	-1.64969	-1.4482
MSMEG_5940		2-keto-4-pentenoate hydratase	-1.62925	-1.25156
MSMEG_4357		ABC transporter, ATP-binding protein	-1.58545	-1.67962
MSMEG_5077		probable conserved integral membrane protein	-1.57336	-1.45058
MSMEG_6727		amino acid permease-associated region	-1.55338	-1.71125
MSMEG_5904		conserved domain protein	-1.55121	-1.30706
MSMEG_2398	thiL	thiamine-monophosphate kinase	-1.53943	-1.67137
MSMEG_4356		inner membrane ABC transporter permease protein YddQ	-1.53696	-1.50602
MSMEG_1466	rplX	ribosomal protein L24	-1.49887	-1.34524
MSMEG_0014		Formyl transferase	-1.4929	-1.45071
MSMEG_0693		conserved hypothetical protein	-1.49054	-1.7202
MSMEG_0956	hemB	delta-aminolevulinic acid dehydratase	-1.48962	-1.31429
MSMEG_1673	cdd	cytidine deaminase	-1.45101	-1.38742
MSMEG_6612	moxR	ATPase, MoxR family protein	-1.44329	-1.71894
MSMEG_0103		major facilitator family protein transporter	-1.43021	-2.22459
MSMEG_5518		antigen 34 kDa	-1.41592	-1.46869
MSMEG_2739		conserved hypothetical protein	-1.39256	-1.36895
MSMEG_3618		alanine and proline-rich secreted protein apa	-1.37458	-1.95048
MSMEG_0304		acyl-CoA synthase	-1.37023	-1.27582
MSMEG_2381		conserved hypothetical protein	-1.35846	-1.49311
MSMEG_3331		hypothetical protein	-1.35232	-1.42559
MSMEG_6198		DNA-binding protein, putative	-1.3473	-1.26006
MSMEG_4361		conserved hypothetical protein	-1.34536	-1.35505
MSMEG_0848		NADH ubiquinone oxidoreductase subunit 5	-1.33856	-1.22388
MSMEG_3310		integral membrane protein	-1.33679	-1.4585
MSMEG_6452		[NADP+] succinate-semialdehyde dehydrogenase	-1.30186	-1.32397
MSMEG_6036		biphenyl-2,3-diol 1,2-dioxygenase	-1.2663	-1.27855
MSMEG_0359		conserved hypothetical protein	-1.21863	-1.43256
MSMEG_2881		aldehyde dehydrogenase	1.24232	1.26793
MSMEG_0717		aldose 1-epimerase subfamily protein	1.28453	1.31342
MSMEG_6163		conserved hypothetical protein	1.28817	1.66187
MSMEG_3414		conserved hypothetical protein	1.31307	1.4162
MSMEG_4093		oxidoreductase, aldo/keto reductase family protein	1.31309	1.66385
MSMEG_3735		YtnM protein	1.31429	1.4433
MSMEG_2047		probable enoyl-CoA hydratase	1.316	1.65272
MSMEG_4687		cytosine deaminase	1.32833	1.46103
MSMEG_0732	clpB	chaperone ClpB	1.3454	1.3144
MSMEG_2545		radical SAM enzyme, Cfr family protein	1.3502	1.54361
MSMEG_1382		MmpL5 protein	1.37692	1.49638
MSMEG_2552		aldehyde dehydrogenase (NAD) family protein	1.37966	1.47486
MSMEG_2832		hypothetical protein	1.40981	1.39263
MSMEG_5503		hypothetical protein	1.42996	1.47033
MSMEG_2672		acyl-CoA synthase	1.4321	1.86427
MSMEG_5506		hypothetical protein	1.43884	1.91062
MSMEG_1706		xylose transport system permease protein XylH	1.45408	1.42738
MSMEG_5592		conserved hypothetical protein	1.45468	1.63128
MSMEG_2842	ssuD	nitrilotriacetate monooxygenase component A	1.46149	2.0614
MSMEG_1705		D-xylose transport ATP-binding protein XylG	1.46631	1.49505
MSMEG_1368	rpoC	DNA-directed RNA polymerase, beta' subunit	1.46963	1.61343
MSMEG_6745		transcriptional regulator, GntR family protein	1.48616	1.36052
MSMEG_0190		integral membrane transport protein	1.49632	1.46151
MSMEG_4545		bacterial extracellular solute-binding protein, family protein 5	1.50347	2.18558
MSMEG_4533		sulfate-binding protein	1.52352	1.58155
MSMEG_4111		alpha-methylacyl-CoA racemase	1.52512	1.64183
MSMEG_1367	rpoB	DNA-directed RNA polymerase, beta subunit	1.52713	1.36692
MSMEG_4614		GAF family protein	1.53442	2.06461
MSMEG_5290		hypothetical protein	1.54867	1.8134
MSMEG_5612		amino-acid acetyltransferase	1.59161	1.52311
MSMEG_2831		hypothetical protein	1.60425	1.7943
MSMEG_3924		peptide synthetase ScpsB, putative	1.60464	2.01839
MSMEG_0765		zinc finger, UBP-type	1.60468	1.53399
MSMEG_2922		conserved hypothetical protein	1.61302	1.69509
MSMEG_1852	selD	selenide, water dikinase	1.62093	1.54101
MSMEG_1915	rshA	anti-sigma factor, family protein	1.62291	1.81965
MSMEG_4517		TetR-type transcriptional regulator of sulfur metabolism	1.6406	2.0187
MSMEG_3850		alkanesulfonate monooxygenase family protein	1.66143	2.79904
MSMEG_5674		membrane transport protein	1.68006	1.50951
MSMEG_2721	hypB	hydrogenase accessory protein HypB	1.69248	1.39546
MSMEG_0556		ABC transporter, nucleotide binding/ATPase protein	1.69695	2.81911
MSMEG_0538		regulatory protein, MarR	1.70603	2.23926
MSMEG_5353		putative methyltransferase	1.71938	1.6225
MSMEG_6503		transcriptional regulator, TetR family protein	1.73189	1.36391
MSMEG_1061		phosphohydrolase	1.73199	1.58948
MSMEG_2764		probable conserved alanine rich transmembrane protein	1.73551	1.4004
MSMEG_5260		conserved hypothetical protein	1.73856	1.46817
MSMEG_3313		xylose repressor, putative	1.7463	1.59628
MSMEG_1916		hypothetical protein	1.75223	1.86368
MSMEG_6415		conserved hypothetical protein	1.76615	1.46085
MSMEG_2841		putative monooxygenase	1.80224	2.02383
MSMEG_4548		acetyltransferase, gnat family protein	1.80572	1.93569
MSMEG_3959		transcriptional regulator	1.81255	1.83216
MSMEG_2746		conserved hypothetical alanine and leucine rich protein	1.81741	1.29403
MSMEG_6301	ligD	DNA polymerase LigD, polymerase domain	1.82201	1.7345
MSMEG_2756		conserved hypothetical protein	1.82334	1.63991
MSMEG_2176		conserved hypothetical protein	1.83153	1.44198
MSMEG_5261		mycothiol conjugate amidase Mca	1.84126	1.41601
MSMEG_3351		hypothetical protein	1.84589	1.78388
MSMEG_1917		conserved domain protein	1.84929	1.90262
MSMEG_5495		enoyl-CoA hydratase	1.87597	1.74939
MSMEG_0553		probable sugar ABC transporter, substrate-binding protein, putative	1.87713	2.50509
MSMEG_1176		hypothetical protein	1.90691	1.36167
MSMEG_0492		conserved hypothetical protein	1.91937	1.60946
MSMEG_3882		glyoxalase family protein	1.93556	1.76863
MSMEG_2883		feruloyl-CoA synthetase	1.94464	1.30452
MSMEG_4423		oxidoreductase	1.95719	1.50618
MSMEG_4529		secreted protein	1.98678	2.01532
MSMEG_1918		sensor histidine kinase	1.98961	1.54021
MSMEG_1516		thioredoxin reductase	1.99866	1.46876
MSMEG_5165		integral membrane protein	1.99953	2.82806
MSMEG_1704		ABC transporter	2.00504	1.60802
MSMEG_3853		putative aliphatic sulfonates transport ATP-binding protein SsuB	2.03093	2.92258
MSMEG_6022		xylose repressor, ROK-family protein transcriptional regulator	2.03145	1.56375
MSMEG_1968		putative oxidoreductase	2.04986	2.99722
MSMEG_4528		phosphoadenosine phosphosulfate reductase	2.05882	2.13029
MSMEG_1693		succinate dehydrogenase [ubiquinone] flavoprotein subunit	2.06249	1.51044
MSMEG_5320		hypothetical protein	2.0744	2.20851
MSMEG_2737		ppe family protein	2.09396	1.84443
MSMEG_1170		conserved domain protein	2.09514	1.91292
MSMEG_5494		acyl-CoA dehydrogenase fadE12	2.09849	2.20955
MSMEG_2846		ABC transporter permease protein	2.12749	2.71444
MSMEG_2997		conserved hypothetical protein	2.13486	2.28553
MSMEG_1955		conserved hypothetical protein	2.14185	1.67579
MSMEG_4518		conserved hypothetical protein	2.14529	3.76209
MSMEG_5206		regulatory protein	2.14766	1.78328
MSMEG_1938		conserved hypothetical protein	2.15687	1.49698
MSMEG_1508		amino acid permease-associated region	2.16563	1.76792
MSMEG_5732		monooxygenase	2.17194	1.47569
MSMEG_5193		transcriptional regulator, AraC family protein	2.19264	1.57047
MSMEG_3395		short chain dehydrogenase	2.21059	2.14713
MSMEG_0552		conserved hypothetical protein	2.21421	2.19818
MSMEG_3621	ndh	NADH dehydrogenase	2.23935	2.11362
MSMEG_1617		kumamolisin	2.24847	1.97031
MSMEG_3370		hypothetical protein	2.25783	2.18304
MSMEG_6704		shikimate 5-dehydrogenase	2.30291	1.55998
MSMEG_5597		transcriptional regulator, TetR family protein	2.33384	1.63661
MSMEG_1511		putative oxidoreductase	2.33708	1.95502
MSMEG_1414		Amidinotransferase	2.34329	2.96275
MSMEG_2059	nuoE	NADH-quinone oxidoreductase chain e	2.36186	1.85674
MSMEG_5071	rseA	conserved hypothetical protein	2.40508	1.607
MSMEG_6828		transcriptional regulator	2.47862	1.70849
MSMEG_6576		pyridoxamine 5'-phosphate oxidase family protein	2.50398	1.93973
MSMEG_6565		conserved hypothetical protein	2.52338	1.83367
MSMEG_3010		acetyl-hydrolase	2.53588	2.13523
MSMEG_4464		modulator of DNA gyrase	2.53591	1.50328
MSMEG_0831		short chain dehydrogenase	2.53743	1.59286
MSMEG_1753	mtnN	MTA/SAH nucleosidase	2.53771	2.29487
MSMEG_6843		NAD-dependent epimerase/dehydratase	2.56606	2.4651
MSMEG_5168		conserved hypothetical protein	2.57757	2.10529
MSMEG_6790		AP endonuclease, family protein 2	2.58943	1.95451
MSMEG_2213		O-methyltransferase	2.58986	2.6678
EBG00000994558	Ms_IGR-8		2.64053	2.61919
MSMEG_3305		integral membrane protein DUF6	2.6427	2.18724
MSMEG_5564		NAD(P)H dehydrogenase, quinone family protein	2.64482	3.30301
MSMEG_0776		conserved hypothetical protein	2.65948	2.38663
MSMEG_4925		transcriptional regulator, Ada family protein/DNA-3-methyladenine glycosylase II	2.70955	2.91598
MSMEG_5492		acetyl-CoA carboxylase carboxyltransferase	2.82268	2.15886
MSMEG_0302		peptidase, S9A/B/C families	2.86161	1.77557
MSMEG_5493		acetyl-/propionyl-coenzyme A carboxylase alpha chain	2.91423	2.36839
MSMEG_4378		two-component system response regulator	2.9469	2.4184
MSMEG_2847		bacterial extracellular solute-binding protein, family protein 5	2.96682	3.50401
MSMEG_4144		transcriptional regulator, LysR family protein	3.04208	2.16372
MSMEG_2062	nuoB	NADH-quinone oxidoreductase, B subunit	3.12265	2.20004
MSMEG_1138		alcohol dehydrogenase 1	3.37605	3.31752
MSMEG_5295		peroxisomal-coenzyme A synthetase	3.51544	1.87915
MSMEG_4143		conserved hypothetical protein	3.54386	2.8191
MSMEG_5760		GntR-family protein regulator	3.70978	1.69932
MSMEG_2663		conserved hypothetical protein	3.75565	2.09824
MSMEG_6469		conserved hypothetical protein	3.91767	3.9087
MSMEG_5593		pyruvate dehydrogenase	3.99532	3.84965
MSMEG_3360		transcriptional regulator, putative	4.62333	3.86265
MSMEG_2848		transmembrane efflux protein	4.95323	5.59556
MSMEG_6066		30S ribosomal protein S14	9.05414	7.43243
MSMEG_6068	rpmB	ribosomal protein L28	9.86348	9.01302
MSMEG_6067	rpmG	ribosomal protein L33	10.2722	9.31526
